# Supplementary material
Source: PubMed Central journal article supplement (PMC7294698)
Supplement: NIHMS1068062-supplement-1.pdf [file NIHMS1068062-supplement-1.pdf]

## 6.1 Supplemental Tables

**Table S1.** Demographically stratified adjusted association between urinary VOC metabolite levels and Greenness 100 m peak NDVI. Values represent % change (95% confidence intervals) per 0.1 NDVI.\* represents significant interaction.

| VOC Metabolite | Male (n=98)          | Female (n=111)         | White (n=107)        | Black (n=90)         |
|----------------|----------------------|------------------------|----------------------|----------------------|
| CEMA           | -8.6 (-19.1, 3.3)    | -2.4 (-16.4, 14.0)     | -11.8 (-22.9, 0.9)   | -8.8 (-22.6, 7.5)    |
| 3HPMA          | -15.1 (-26.7, -15.1) | -6.3 (-20.0, 9.9)      | -14.9 (-26.8, -1.1)  | -0.2 (-14.1, 15.9) * |
| AAMA           | -17.5 (-29.7, -17.5) | -11.6 (-24.2, 3.0)     | -26.4 (-39.0, -11.3) | 4.9 (-9.5, 21.5)     |
| CYMA           | -35.1 (-52.4, -35.1) | -5.9 (-29.9, 26.2)     | -62.2 (-75.1, -42.7) | -3.5 (-23.6, 21.8) * |
| HEMA           | 29.1 (4.7, 59.2)     | -27.9 (-42.1, -10.1) * | -6.3 (-22.1, 12.7)   | -0.7 (-26.0, 33.3)   |
| MU             | -25.9 (-41.5, -6.1)  | -23.5 (-45.7, 7.6)     | -37.2 (-50.8, -20.0) | -14.5 (-37.5, 16.8)  |
| BPMA           | 0.8 (-18.9, 25.3)    | -26.4 (-41.2, -7.8) *  | -29.2 (-43.2, -11.6) | -0.9 (-23.1, 27.7)   |
| DHBMA          | -2.5 (-11.2, -2.5)   | -7.0 (-15.3, 2.1)      | -11.1 (-18.2, -3.2)  | -0.0 (-10.9, 12.2)   |
| MHBMA3         | -26.8 (-38.8, -12.5) | 39.0 (7.4, 79.8) *     | -28.0 (-42.7, -9.5)  | 10.9 (-10.7, 37.9) * |
| HPMMA          | -2.9 (-12.9, 8.1)    | 0.2 (-16.0, 19.6)      | -4.9 (-21.6, 15.3)   | 0.7 (-12.3, 15.7)    |
| AMCC           | -7.8 (-17.8, 3.4)    | 5.0 (-6.7, 18.1)       | -9.3 (-20.0, 2.9)    | 2.8 (-9.6, 17.0)     |
| PGA            | -2.6 (-11.7, 7.5)    | -8.9 (-16.5, -0.5)     | -7.9 (-15.6, 0.6)    | 2.2 (-9.9, 15.8)     |
| 2HPMA          | -4.3 (-20.6, 15.3)   | -31.8 (-44.9, -15.6) * | -18.1 (-32.1, -1.3)  | -17.5 (-36.5, 7.3)   |
| PHEMA          | 0.6 (-13.7, 17.3)    | -4.1 (-22.7, 19.0)     | -20.5 (-30.5, -9.1)  | 17.2 (-8.0, 49.4) *  |
| MA             | -1.9 (-13.8, 11.6)   | -2.5 (-10.2, 5.9)      | -4.5 (-13.8, 5.8)    | 2.6 (-10.6, 17.7)    |
| BMA            | -21.9 (-38.5, -0.7)  | 6.3 (-15.8, 34.2)      | -24.7 (-39.1, -6.9)  | 12.1 (-19.5, 56.1) * |
| 2MHA           | -3.4 (-22.6, 20.6)   | 12.7 (-15.7, 50.5)     | -15.1 (-38.0, 16.3)  | 28.4 (1.1, 63.0) *   |
| 3MHA+4MHA      | -20.5 (-35.4, -2.2)  | -13.2 (-28.7, 5.8)     | -42.5 (-53.1, -29.6) | 9.6 (-7.3, 29.7) *   |

**Table S2.** Environmentally stratified adjusted associations between urinary VOC metabolite levels and greenness 100 m NDVI peak. Values represent % change (95% confidence intervals) per 0.1 NDVI. \* represents significant interaction.

| VOC Metabolite | Low Veh. M (n=105)   | High Veh. M (n=106)    | Low Pop (n=106)      | High Pop. (n=105)      |
|----------------|----------------------|------------------------|----------------------|------------------------|
| CEMA           | 4.8 (-10.8, 23.0)    | -12.6 (-23.1, -0.7)    | -10.7 (-21.7, 1.9)   | -4.4 (-18.2, 11.8)     |
| 3HPMA          | 0.0 (-15.2, 17.9)    | -14.3 (-24.4, -2.8)    | -12.8 (-24.6, 1.0)   | -14.5 (-26.9, 0.0)     |
| AAMA           | -13.6 (-27.2, 2.5)   | -15.9 (-27.5, -2.4)    | -16.4 (-29.0, -1.5)  | -13.8 (-25.7, 0.1)     |
| CYMA           | -16.1 (-42.6, 22.5)  | -23.4 (-45.3, 7.3)     | -40.0 (-59.3, -11.4) | 13.1 (-15.5, 51.3) *   |
| HEMA           | -22.4 (-38.5, -2.1)  | 21.6 (-0.6, 48.7) *    | -4.5 (-21.6, 16.3)   | 7.0 (-15.6, 35.6)      |
| MU             | -36.7 (-53.4, -14.1) | -18.8 (-37.1, 4.9)     | -40.4 (-53.1, -24.2) | 3.6 (-20.4, 34.8) *    |
| BPMA           | 32.1 (7.6, 62.1)     | -35.9 (-48.3, -20.4) * | -23.2 (-38.6, -3.9)  | -18.9 (-36.5, 3.5)     |
| DHBMA          | -3.2 (-13.1, 7.9)    | -7.2 (-14.4, 0.7)      | -7.4 (-14.7, 0.4)    | -3.2 (-13.0, 7.7)      |
| MHBMA3         | 11.9 (-12.0, 42.3)   | -13.5 (-31.3, 8.9)     | -7.7 (-26.8, 16.2)   | -2.1 (-23.2, 24.8)     |
| HPMMA          | 7.6 (-5.4, 22.3)     | -9.5 (-22.9, 6.3) *    | -6.9 (-22.4, 5.2)    | -0.7 (-14.5, 15.3)     |
| AMCC           | -2.3 (-13.9, 10.8)   | -5.4 (-15.7, 6.1)      | -6.6 (-17.1, 5.2)    | 1.0 (-11.0, 14.6)      |
| PGA            | -5.7 (-14.7, 4.2)    | -8.3 (-15.8, -0.0)     | -4.8 (-13.8, 5.1)    | -6.1 (-13.9, 2.3)      |
| 2HPMA          | 7.7 (-14.6, 35.9)    | -32.4 (-42.1, -21.0) * | -18.6 (-34.0, 0.5)   | -28.3 (-39.9, -14.5) * |
| PHEMA          | -1.0 (-19.8, 22.1)   | 1.4 (-12.9, 17.9)      | -13.8 (-27.6, 2.6)   | 5.2 (-10.9, 24.3)      |
| MA             | -2.7 (-14.0, 10.2)   | -4.5 (-13.4, 5.4)      | -4.9 (-14.1, 5.3)    | -0.7 (-11.7, 11.6)     |
| BMA            | -6.6 (-29.3, 23.4)   | -19.2 (-33.3, -2.1)    | -25.5 (-39.9, -7.5)  | 0.9 (-22.5, 31.4) *    |
| 2MHA           | 8.7 (-19.3, 46.2)    | 9.3 (-14.9, 40.2)      | 2.3 (-20.7, 32.0)    | 17.3 (-11.5, 55.6)     |
| 3MHA+4MHA      | 6.7 (-12.0, 29.3)    | -27.8 (-39.8, -13.5) * | -29.3 (-41.0, -15.4) | 3.6 (-16.2, 28.1) *    |
